# Supplementary material
Source: Springer Nature journal article supplement (https://www.springermedizin.de/resource/supplementary/12876_2013_1091_MOESM1_ESM.pdf/9438422)
Supplement: MOESM1 [file 9438422]

Adults resident in Misisi, section B at the time of the clinical trial n=733

Declined n=233

Randomly assigned n=500

Dropped out: withdrew n=12,  
Moved house n=138, Death n=26  
and those Not eligible for  
assessment due to diarrhoea within  
2weeks, NSAID use within 1month,  
Pregnancy, lactation n=98

Samples collected in 2005 and available in  
the freezer n=226

Unclear labelling n=3

Sample collected after crossover n=8

Total serum samples analysed n=215
